# Supplementary material
Source: ML conference proceedings conference paper supplement (https://proceedings.mlr.press/v115/fakoor20a.html)
Supplement: Supplementary file [file fakoor20a-supp.pdf]

---

# P3O: Policy-on Policy-off Policy Optimization

## Supplementary Material

---

**Rasool Fakoor**  
Amazon Web Services  
fakoor@amazon.com

**Pratik Chaudhari**  
Amazon Web Services  
prtic@amazon.com

**Alexander J. Smola**  
Amazon Web Services  
smola@amazon.com

### A Hyper-parameters for all experiments

Table 1: A2C hyper-parameters on Atari benchmark

| Hyper-parameters                    | Value                                                                   |
|-------------------------------------|-------------------------------------------------------------------------|
| Architecture                        | conv (32-8 × 8-4)<br>conv (64-4 × 4-2)<br>conv (64-3 × 1-1)<br>FC (512) |
| Learning rate                       | $7 \times 10^{-4}$                                                      |
| Number of environments              | 16                                                                      |
| Number of steps per iteration       | 5                                                                       |
| Entropy regularization ( $\alpha$ ) | 0.01                                                                    |
| Discount factor ( $\gamma$ )        | 0.99                                                                    |
| Value loss Coefficient              | 0.5                                                                     |
| Gradient norm clipping coefficient  | 0.5                                                                     |
| Random Seeds                        | {0...2}                                                                 |

Table 2: ACER hyper-parameters on Atari benchmark

| Hyper-parameters                     | Value              |
|--------------------------------------|--------------------|
| Architecture                         | Same as A2C        |
| Replay Buffer size                   | $5 \times 10^4$    |
| Learning rate                        | $7 \times 10^{-4}$ |
| Number of environments               | 16                 |
| Number of steps per iteration        | 20                 |
| Entropy regularization ( $\alpha$ )  | 0.01               |
| Number of training epochs per update | 4                  |
| Discount factor ( $\gamma$ )         | 0.99               |
| Value loss Coefficient               | 0.5                |
| importance weight clipping factor    | 10                 |
| Gradient norm clipping coefficient   | 0.5                |
| Momentum factor in the Polyak        | 0.99               |
| Max. KL between old & updated policy | 1                  |
| Use Trust region                     | True               |
| Random Seeds                         | {0...2}            |

Table 3: PPO hyper-parameters on Atari benchmark

| Hyper-parameters                                   | Value              |
|----------------------------------------------------|--------------------|
| Architecture                                       | Same as A2C        |
| Learning rate                                      | $7 \times 10^{-4}$ |
| Number of environments                             | 8                  |
| Number of steps per iteration                      | 128                |
| Entropy regularization ( $\alpha$ )                | 0.01               |
| Number of training epochs per update               | 4                  |
| Discount factor ( $\gamma$ )                       | 0.99               |
| Value loss Coefficient                             | 0.5                |
| Gradient norm clipping coefficient                 | 0.5                |
| Advantage estimation discounting factor ( $\tau$ ) | 0.95               |
| Random Seeds                                       | {0...2}            |

Table 4: P3O hyper-parameters on Atari benchmark

| Hyper-parameters                                   | Value              |
|----------------------------------------------------|--------------------|
| Architecture                                       | Same as A2C        |
| Learning rate                                      | $7 \times 10^{-4}$ |
| Replay Buffer size                                 | $5 \times 10^4$    |
| Number of environments                             | 16                 |
| Number of steps per iteration                      | 16                 |
| Entropy regularization ( $\alpha$ )                | 0.01               |
| Off policy updates per iteration ( $\xi$ )         | Poisson(2)         |
| Burn-in period                                     | $15 \times 10^3$   |
| Samples from replay buffer                         | 6                  |
| Discount factor ( $\gamma$ )                       | 0.99               |
| Value loss Coefficient                             | 0.5                |
| Gradient norm clipping coefficient                 | 0.5                |
| Advantage estimation discounting factor ( $\tau$ ) | 0.95               |
| Random Seeds                                       | {0...2}            |

### B Comparisons with baseline algorithms

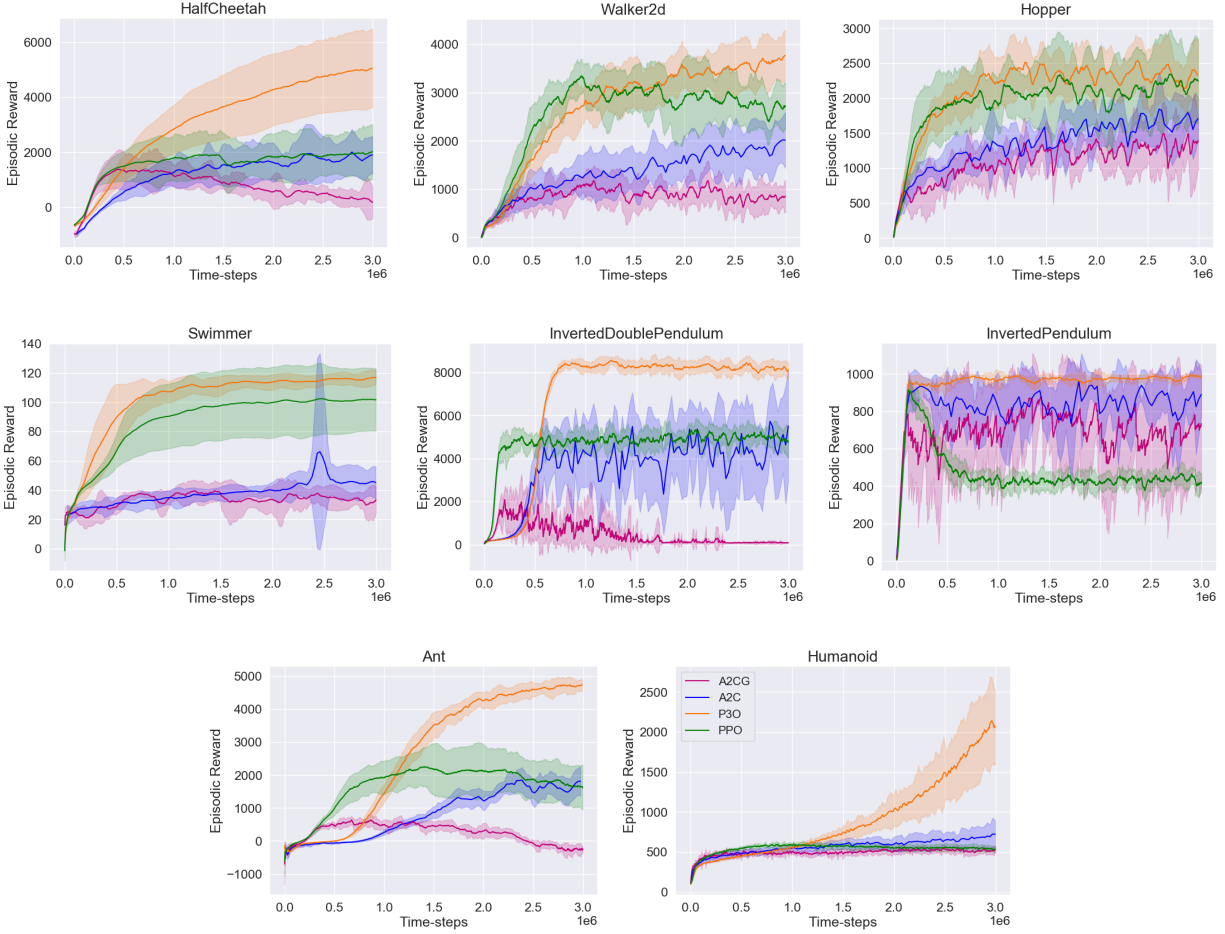

Figure 1: Training curves of A2C (blue), A2CG [A2C with GAE] (magenta), PPO (green) and P3O (orange) on 8 MuJoCo environments.

Table 5: P3O hyper-parameters for MuJoCo tasks

| Hyper-parameters                                   | Value              |
|----------------------------------------------------|--------------------|
| Architecture                                       | FC(100) - FC(100)  |
| Learning rate                                      | $3 \times 10^{-4}$ |
| Replay Buffer size                                 | $5 \times 10^3$    |
| Number of environments                             | 2                  |
| Number of steps per iteration                      | 64                 |
| Entropy regularization ( $\alpha$ )                | 0.0                |
| Off policy updates per iteration ( $\xi$ )         | Poisson(3)         |
| Burn-in period                                     | 2500               |
| Number of samples from replay buffer               | 15                 |
| Discount factor ( $\gamma$ )                       | 0.99               |
| Value loss Coefficient                             | 0.5                |
| Gradient norm clipping coefficient                 | 0.5                |
| Advantage estimation discounting factor ( $\tau$ ) | 0.95               |
| Random Seeds                                       | {0...9}            |

Table 6: A2C (and A2C with GAE) hyper-parameters on MuJoCo tasks

| Hyper-parameters                    | Value               |
|-------------------------------------|---------------------|
| Architecture                        | FC(64) - FC(64)     |
| Learning rate                       | $13 \times 10^{-3}$ |
| Number of environments              | 8                   |
| Number of steps per iteration       | 32                  |
| Entropy regularization ( $\alpha$ ) | 0.0                 |
| Discount factor ( $\gamma$ )        | 0.99                |
| Value loss Coefficient              | 0.5                 |
| Gradient norm clipping coefficient  | 0.5                 |
| Random Seeds                        | {0...9}             |

Table 7: PPO hyper-parameters on MuJoCo tasks

| Hyper-parameters                                   | Value              |
|----------------------------------------------------|--------------------|
| Architecture                                       | FC(64) - FC(64)    |
| Learning rate                                      | $3 \times 10^{-4}$ |
| Number of environments                             | 1                  |
| Number of steps per iteration                      | 2048               |
| Entropy regularization ( $\alpha$ )                | 0.0                |
| Number of training epochs per update               | 10                 |
| Discount factor ( $\gamma$ )                       | 0.99               |
| Value loss Coefficient                             | 0.5                |
| Gradient norm clipping coefficient                 | 0.5                |
| Advantage estimation discounting factor ( $\tau$ ) | 0.95               |
| Random Seeds                                       | {0...9}            |

Table 8: Returns on MuJoCo continuous-control tasks after 3M time-steps of training and 10 random seeds.

| Games                    | A2CG    | A2C     | PPO     | P3O            |
|--------------------------|---------|---------|---------|----------------|
| Half-Cheetah             | 181.46  | 1907.42 | 2022.14 | <b>5051.58</b> |
| Walker                   | 855.62  | 2015.15 | 2727.93 | <b>3770.86</b> |
| Hopper                   | 1377.07 | 1708.22 | 2245.03 | <b>2334.32</b> |
| Swimmer                  | 33.33   | 45.27   | 101.71  | <b>116.87</b>  |
| Inverted Double Pendulum | 90.09   | 5510.71 | 4750.69 | <b>8114.05</b> |
| Inverted Pendulum        | 733.34  | 889.61  | 414.49  | <b>985.14</b>  |
| Ant                      | -253.54 | 1811.29 | 1615.55 | <b>4727.34</b> |
| Humanoid                 | 530.12  | 720.38  | 530.13  | <b>2057.17</b> |

Table 9: Returns of agents on 49 Atari-2600 games after 28M timesteps (112M frames) of training.

| Games            | A2C        | ACER            | PPO             | P3O               |
|------------------|------------|-----------------|-----------------|-------------------|
| Alien            | 1425.00    | 2436.20         | 2260.43         | <b>3124.80</b>    |
| Amidar           | 439.43     | 1393.24         | 1062.73         | <b>1787.40</b>    |
| Assault          | 3897.73    | <b>6996.46</b>  | 5941.23         | 6222.27           |
| Asterix          | 12272.50   | 24414.00        | 7574.33         | <b>25997.00</b>   |
| Asteroids        | 2052.27    | 1874.83         | 2147.33         | <b>2483.30</b>    |
| Atlantis         | 2847251.67 | 2832752.33      | 2647593.67      | <b>3077883.00</b> |
| BankHeist        | 910.43     | <b>1281.60</b>  | 1236.90         | 864.03            |
| BattleZone       | 6250.00    | 10726.67        | <b>22856.67</b> | 12793.33          |
| BeamRider        | 5149.29    | 6486.07         | 3834.01         | <b>11163.49</b>   |
| Bowling          | 24.19      | <b>38.61</b>    | 31.75           | 27.04             |
| Boxing           | 0.21       | 99.33           | 98.06           | <b>99.44</b>      |
| Breakout         | 403.25     | <b>474.81</b>   | 328.80          | 351.81            |
| Centipede        | 3722.24    | 6755.41         | 4530.21         | <b>8615.36</b>    |
| ChopperCommand   | 1389.67    | <b>10376.00</b> | 9504.33         | 8878.33           |
| CrazyClimber     | 111418.67  | 136527.67       | 118501.00       | <b>168115.00</b>  |
| DemonAttack      | 65766.90   | 181679.27       | 37026.17        | <b>331454.95</b>  |
| DoubleDunk       | -17.86     | -8.37           | -6.29           | <b>-3.83</b>      |
| Enduro           | 0.00       | 0.00            | <b>1092.52</b>  | 0.00              |
| FishingDerby     | 29.54      | 45.74           | 29.34           | <b>52.07</b>      |
| Freeway          | 0.00       | 0.00            | <b>32.83</b>    | 0.00              |
| Frostbite        | 269.87     | 304.23          | <b>1266.73</b>  | 312.13            |
| Gopher           | 3923.13    | <b>99855.53</b> | 6451.07         | 29603.60          |
| Gravitar         | 377.33     | 387.00          | <b>1042.67</b>  | 987.50            |
| IceHockey        | -6.39      | -3.97           | -5.11           | <b>-3.50</b>      |
| Jamesbond        | 453.83     | 457.50          | <b>683.67</b>   | 475.00            |
| Kangaroo         | 507.33     | 1524.67         | 11583.67        | <b>13360.67</b>   |
| Krull            | 8935.40    | <b>9115.73</b>  | 8718.40         | 7812.03           |
| KungFuMaster     | 25395.00   | 30002.33        | 34292.00        | <b>46761.67</b>   |
| MontezumaRevenge | 0.00       | 0.00            | 0.00            | <b>805.33</b>     |
| MsPacman         | 2220.63    | 4892.33         | 3502.20         | <b>7516.21</b>    |
| NameThisGame     | 5977.63    | <b>15640.83</b> | 6011.03         | 9232.70           |
| Pitfall          | -65.50     | -7.64           | <b>-1.94</b>    | -7.40             |
| Pong             | 20.21      | 20.80           | 20.69           | <b>20.95</b>      |
| PrivateEye       | 49.24      | <b>99.00</b>    | 97.33           | 92.61             |
| Qbert            | 16289.08   | 22051.67        | 21830.17        | <b>27619.33</b>   |
| Riverraid        | 9680.33    | <b>17794.03</b> | 11841.03        | 13966.67          |
| RoadRunner       | 35918.33   | 40428.67        | 50663.33        | <b>58728.00</b>   |
| Robotank         | 4.30       | 4.89            | 18.54           | <b>33.69</b>      |
| Seaquest         | 1485.33    | 1739.87         | <b>1953.53</b>  | 1851.87           |
| SpaceInvaders    | 1894.02    | <b>3140.17</b>  | 2124.57         | 2699.33           |
| StarGunner       | 55469.33   | <b>65005.00</b> | 63375.67        | 63905.00          |
| Tennis           | -22.22     | -11.26          | -6.72           | <b>-5.27</b>      |
| TimePilot        | 3359.00    | 7012.00         | 7535.67         | <b>10789.00</b>   |
| Tutankham        | 105.28     | <b>291.09</b>   | 206.42          | 268.24            |
| UpNDown          | 30932.20   | 159642.17       | 173208.13       | <b>279107.53</b>  |
| Venture          | 0.00       | 0.00            | <b>0.00</b>     | 0.00              |
| VideoPinball     | 21061.76   | 373803.36       | 220680.47       | <b>377935.99</b>  |
| WizardOfWor      | 1256.33    | 2973.00         | 5744.67         | <b>10637.33</b>   |
| Zaxxon           | 17.00      | 89.33           | 8872.67         | <b>16801.33</b>   |

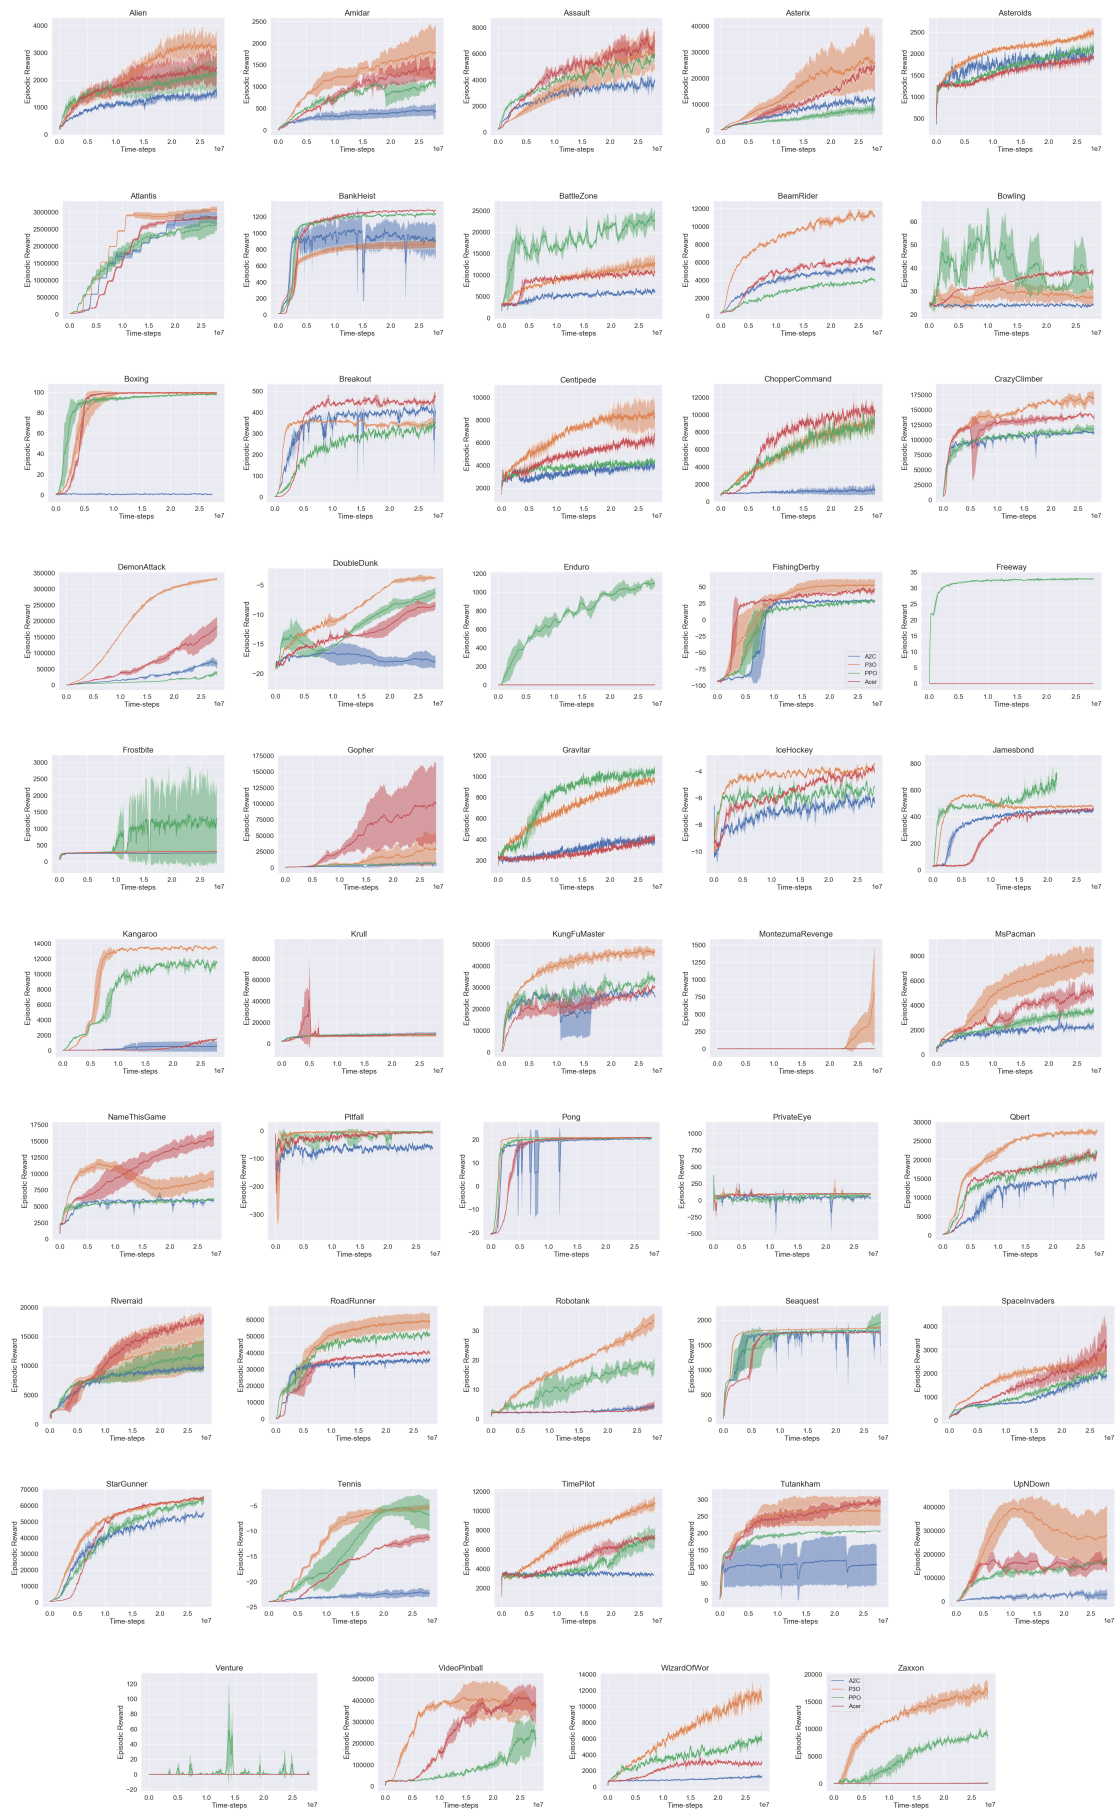

Figure 2: Training curves of A2C (blue), ACER (red), PPO (green) and P3O (orange) on all 49 Atari games.
